# Supplementary material for: Infant and adult SCA13 mutations differentially affect Purkinje cell excitability, maturation, and viability in vivo
Source: eLife journal article supplement (doi:10.7554/elife.57358), 2020-07-09
Supplement: supp [file elife-57358-supp-v1.zip]

Average frequency (Hz)

ExoWT Control

| Group   | Complex spike freq (Hz) |
|---------|-------------------------|
| Control | ~0.4                    |
| ExoWT   | ~0.3                    |
