# Supplementary figures and images for: Infant and adult SCA13 mutations differentially affect Purkinje cell excitability, maturation, and viability in vivo
Source: eLife journal article supplement (doi:10.7554/elife.57358), 2020-07-09

A

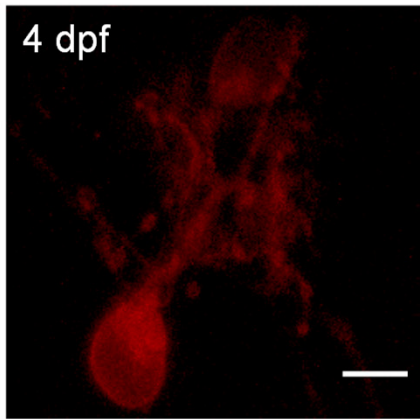

B

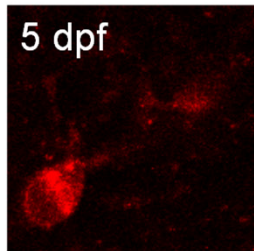

iR4H + mTomato

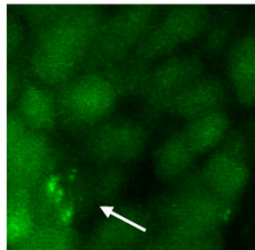

Acridine orange

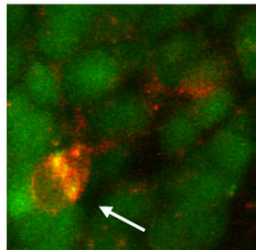

Merge

Supplement: supp [file elife-57358-supp-v1.zip]

A

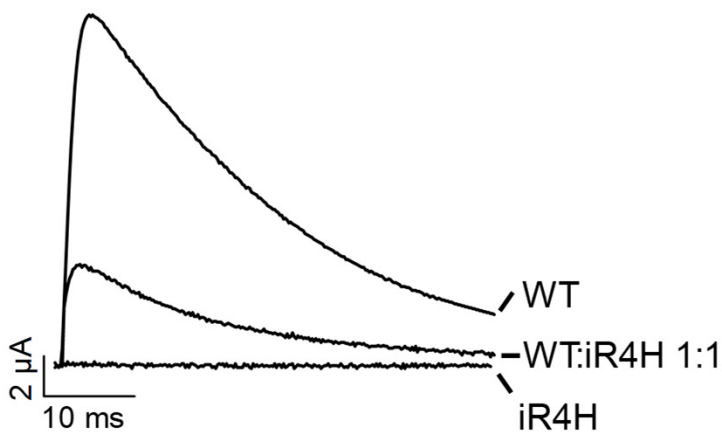

B

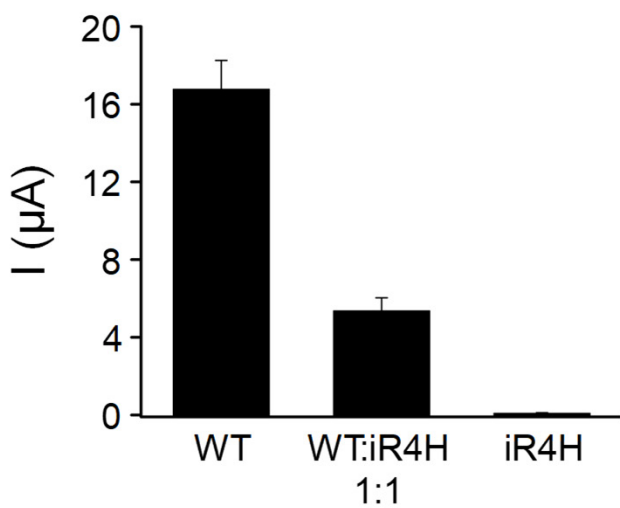

C

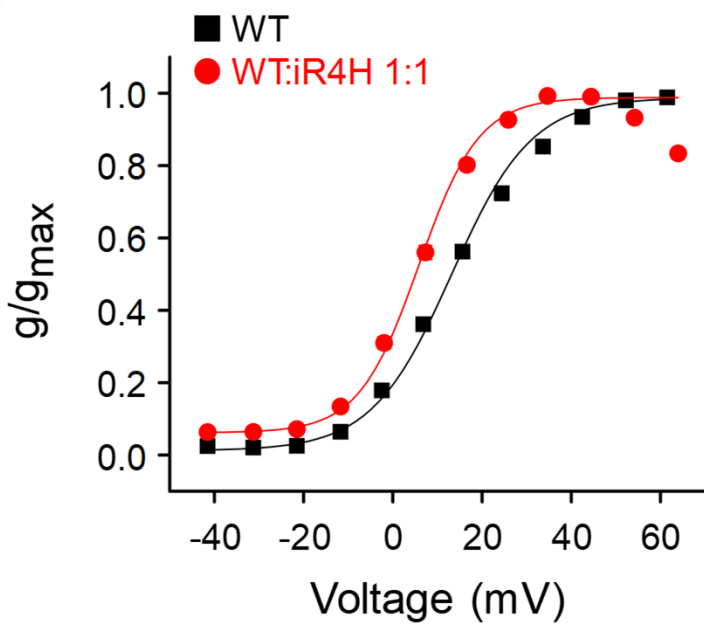

Supplement: supp [file elife-57358-supp-v1.zip]

Sagittal view

Transverse view

EGFP

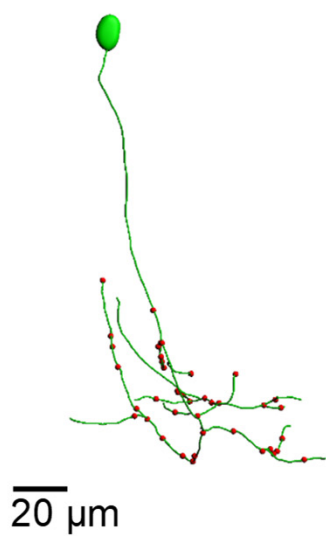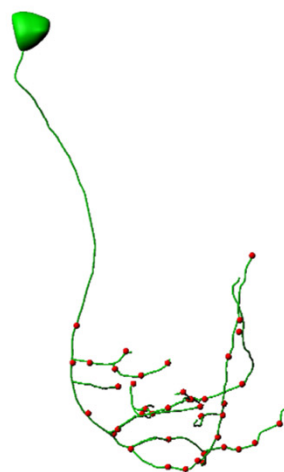

iR4H

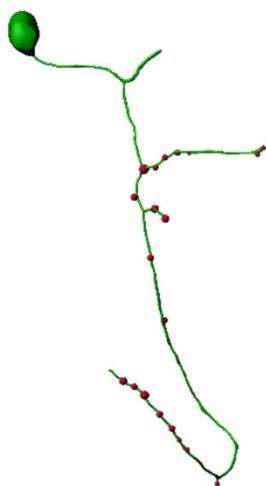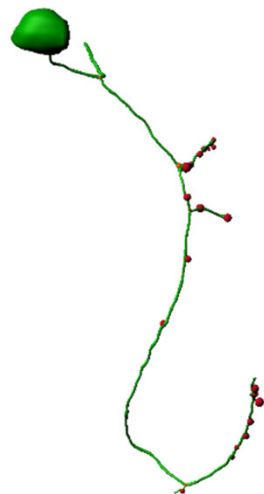

aR3H

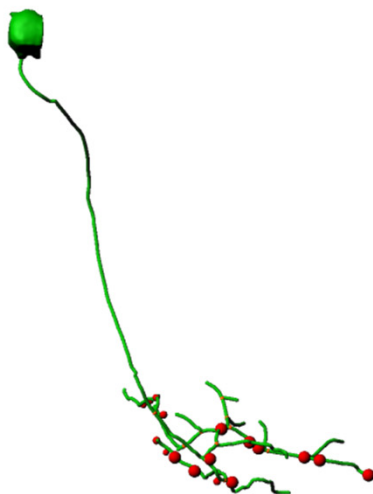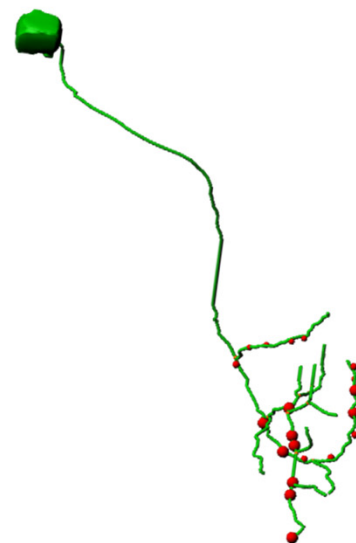

Supplement: supp [file elife-57358-supp-v1.zip]

A

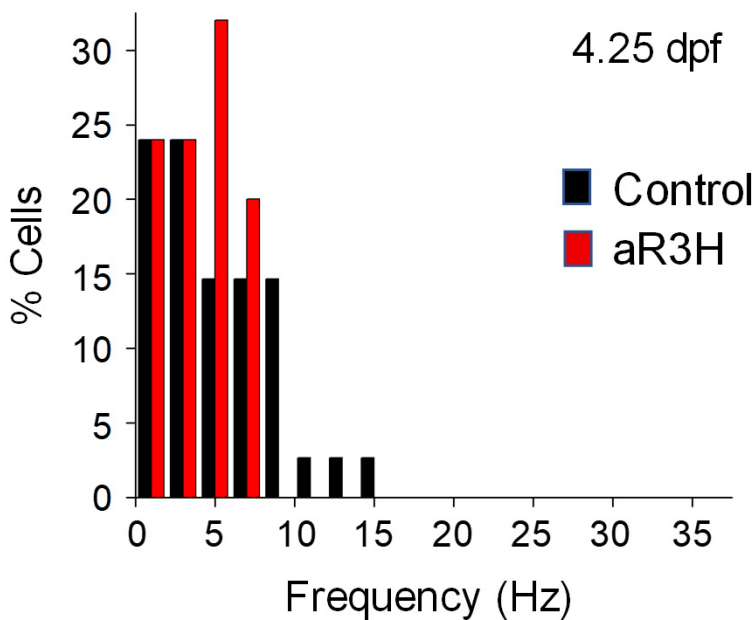

B

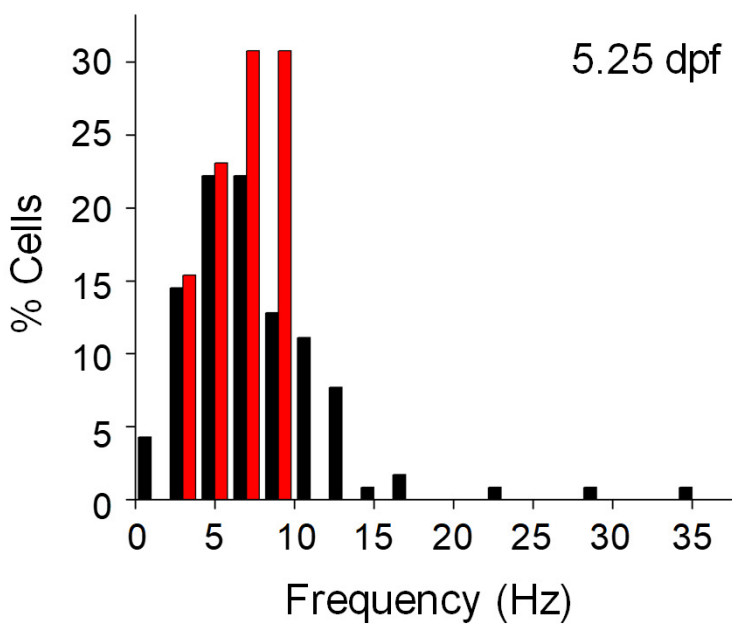

C

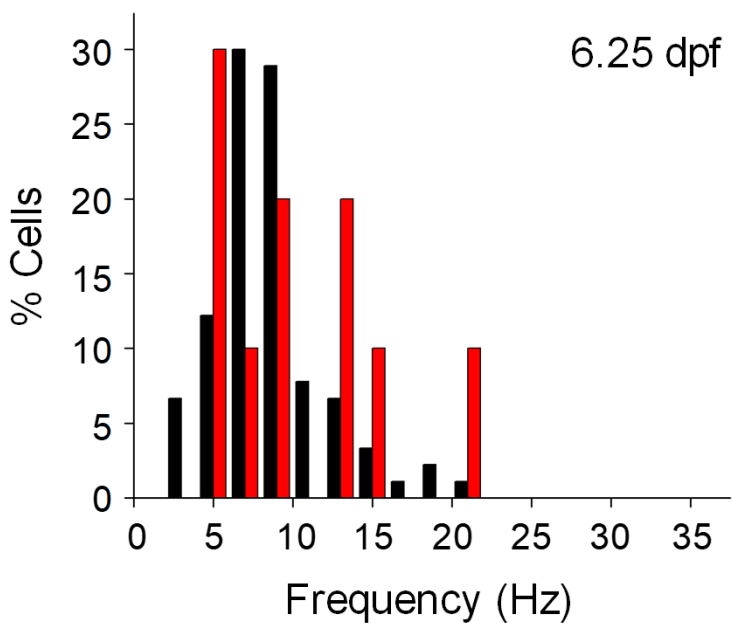

Supplement: supp [file elife-57358-supp-v1.zip]

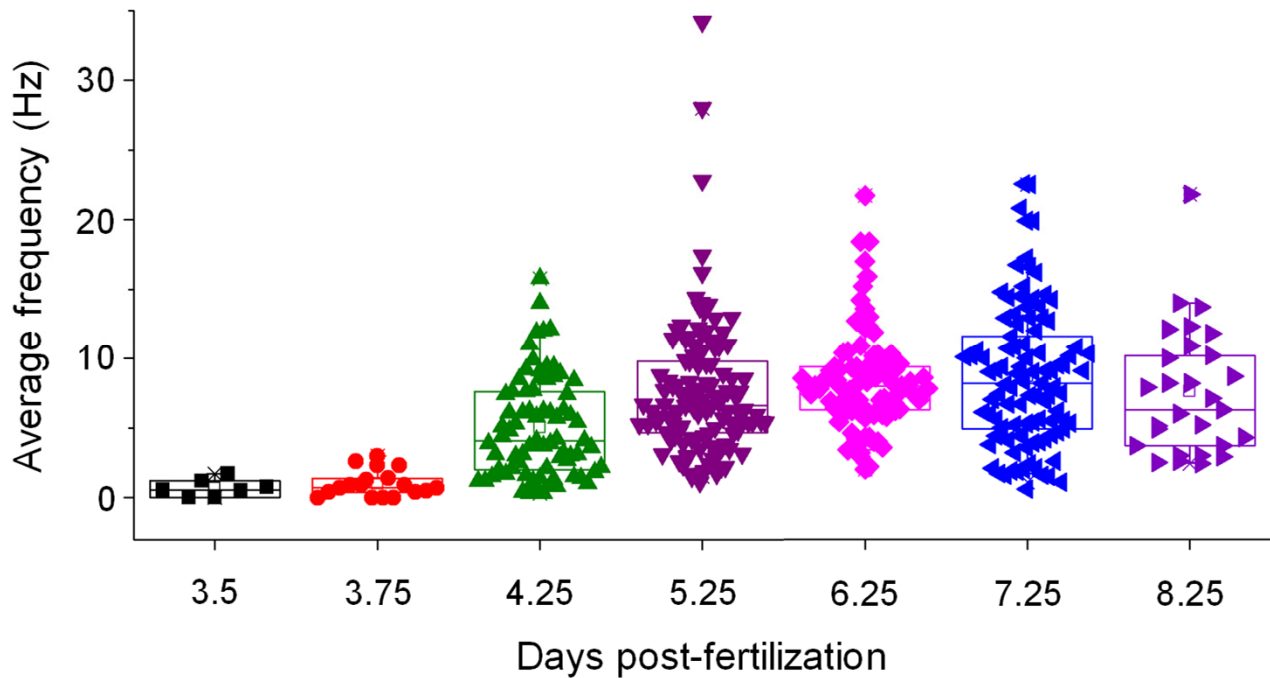

Supplement: supp [file elife-57358-supp-v1.zip]

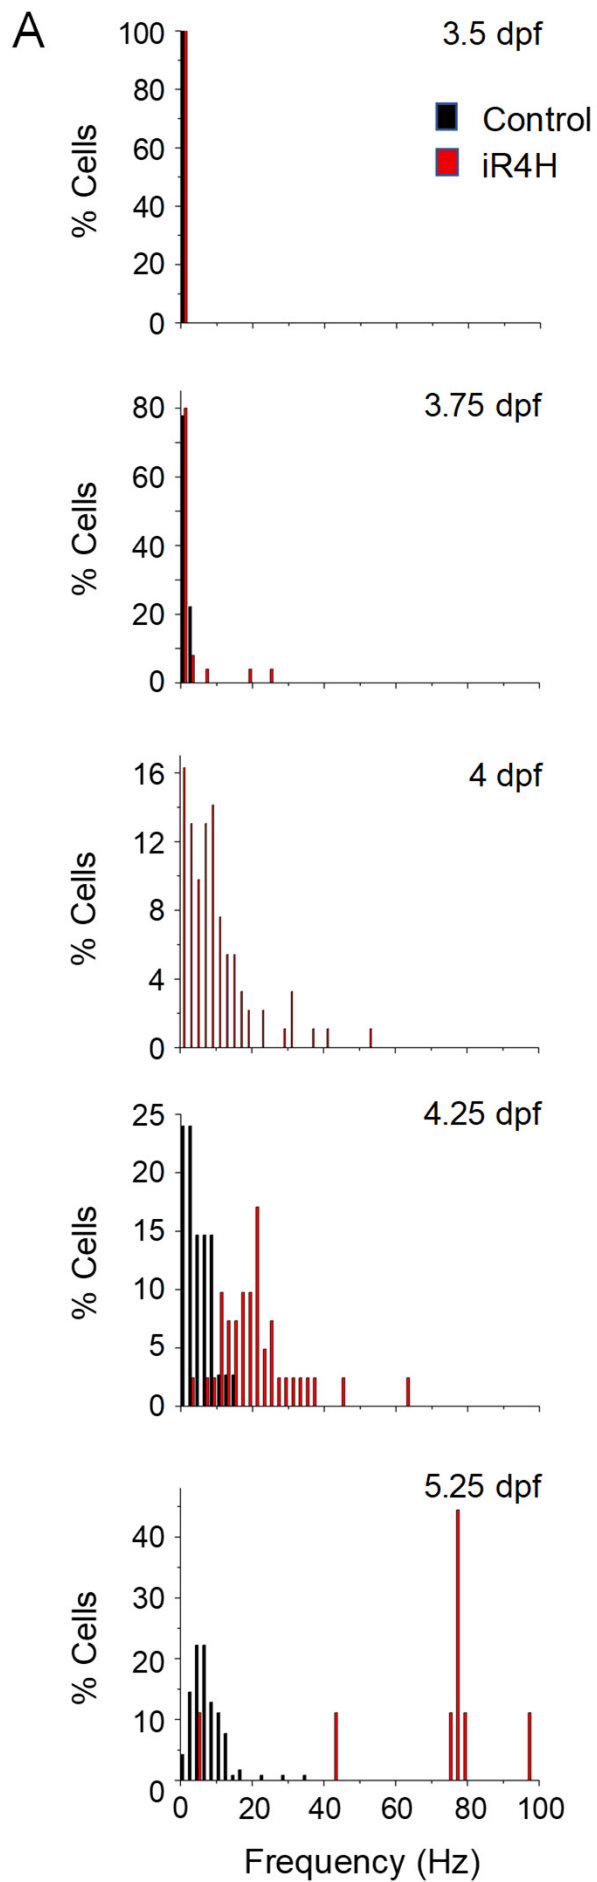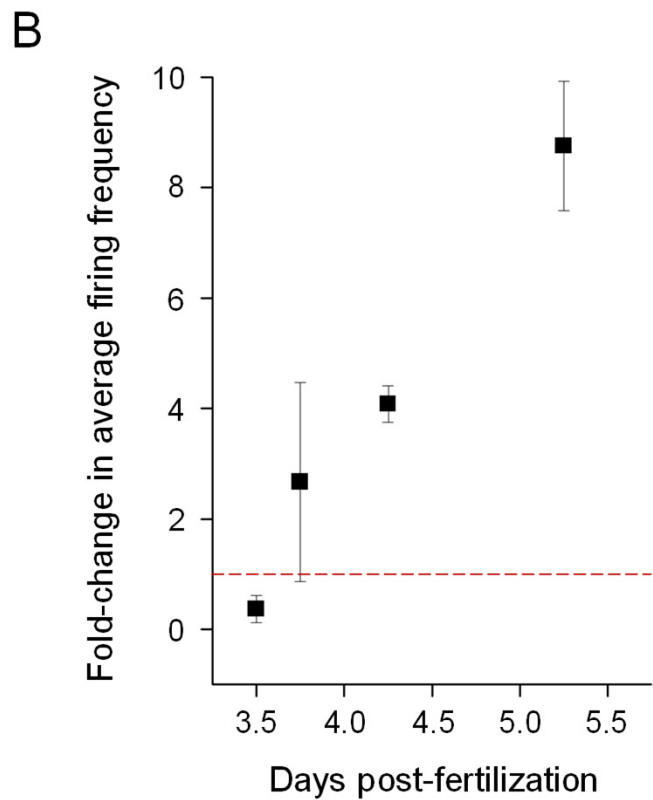

Supplement: supp [file elife-57358-supp-v1.zip]

A

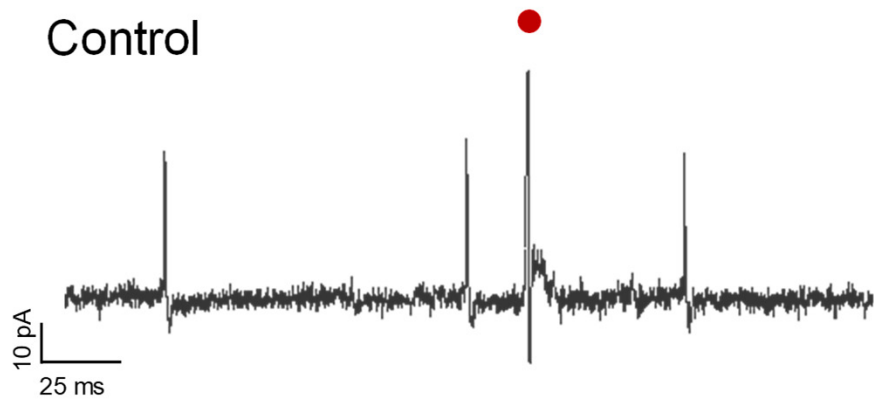

B

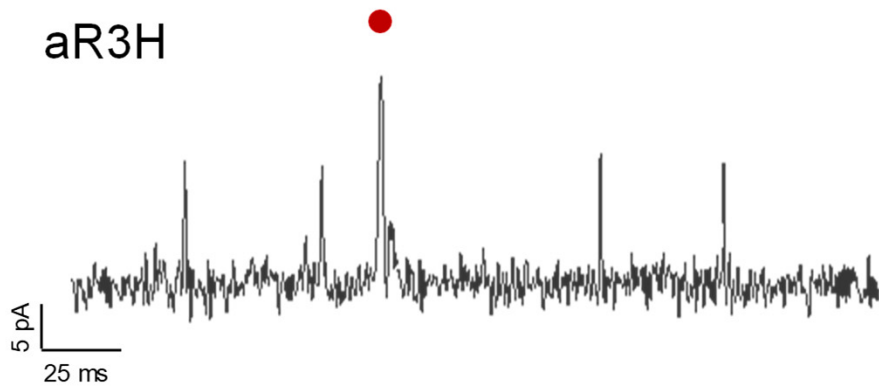

C

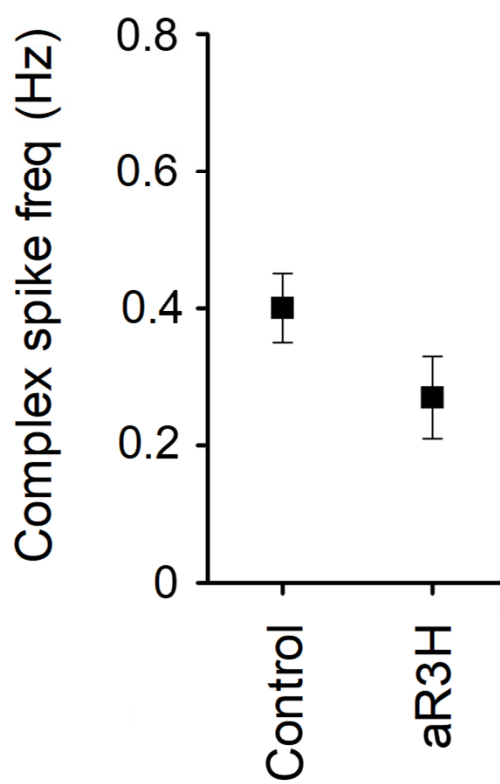

Supplement: supp [file elife-57358-supp-v1.zip]

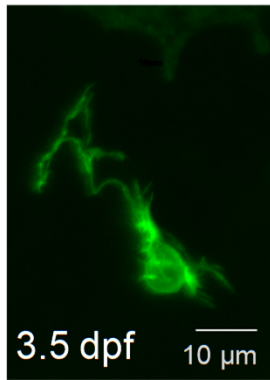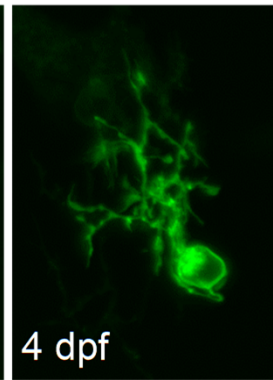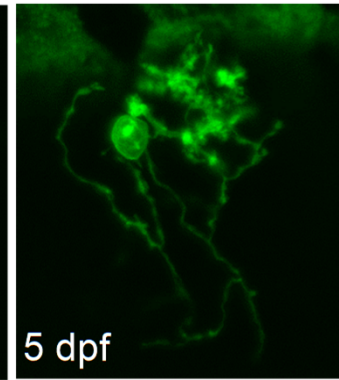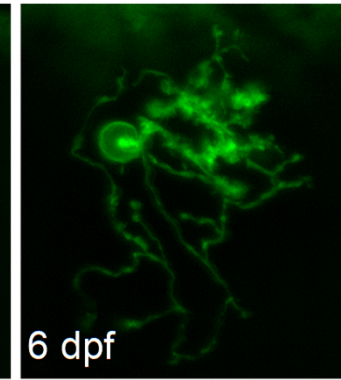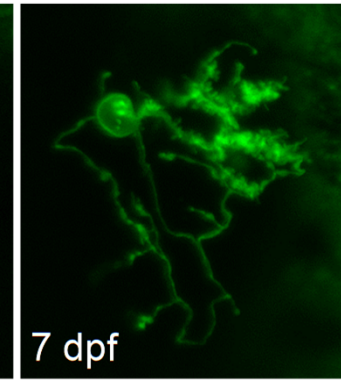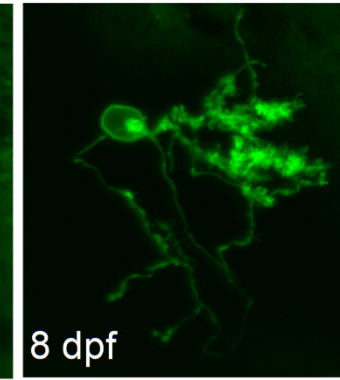

Supplement: supp [file elife-57358-supp-v1.zip]

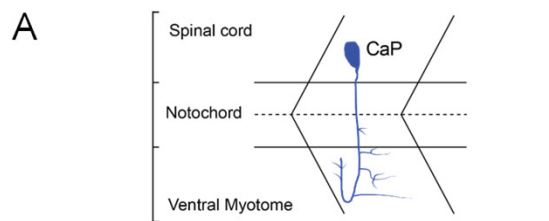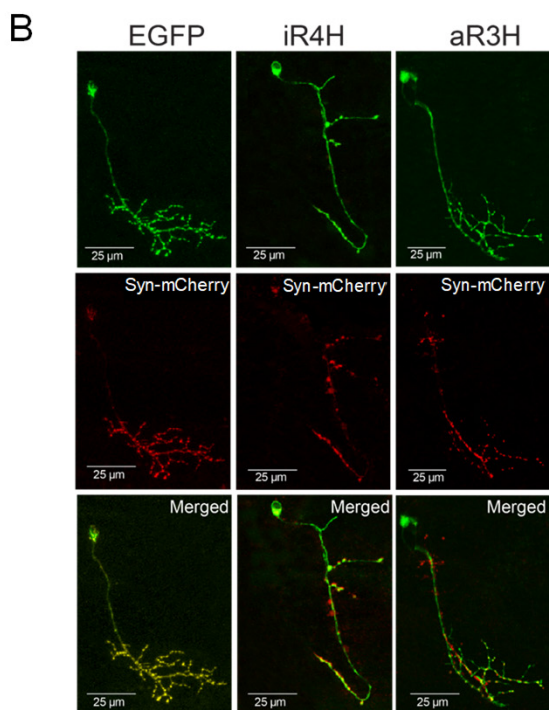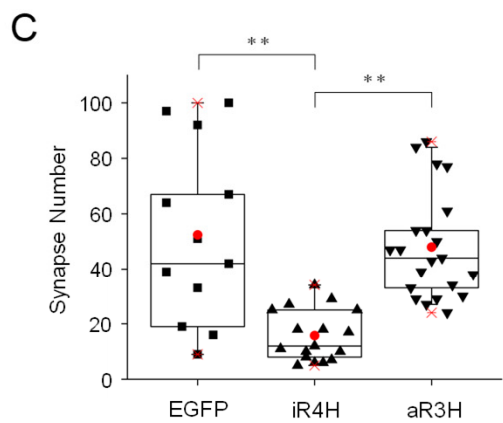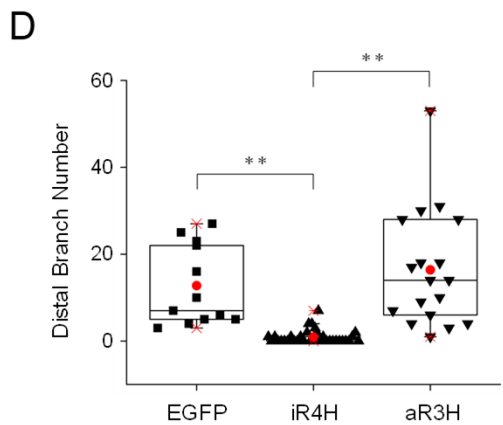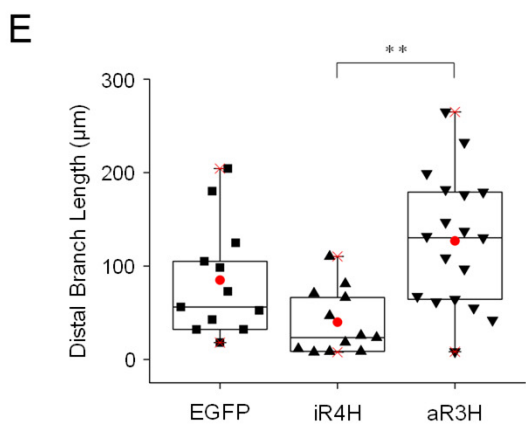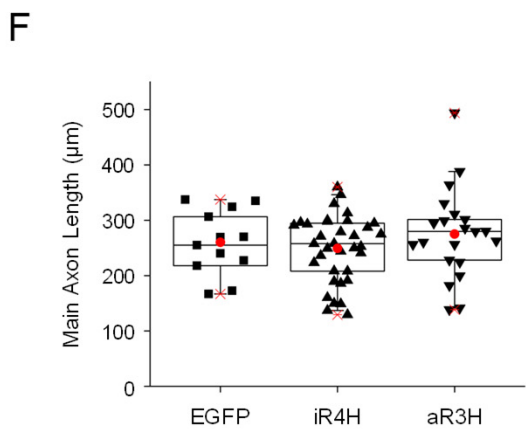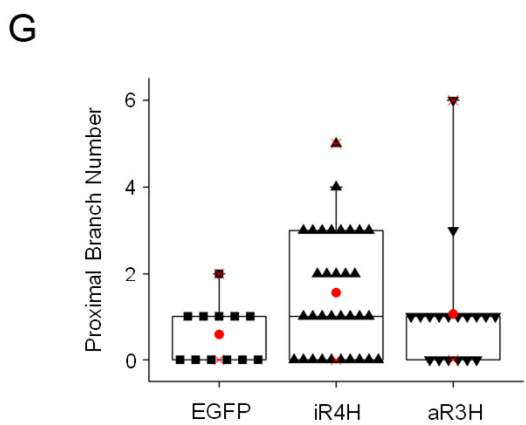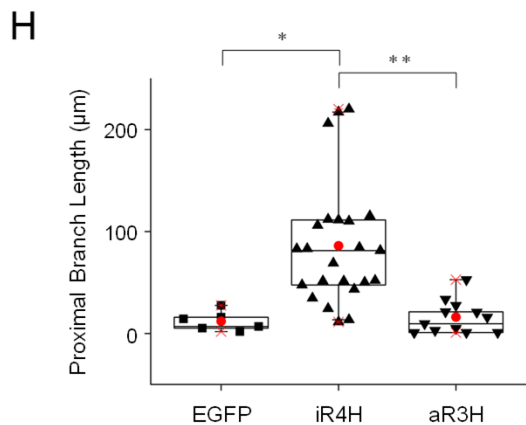

Supplement: supp [file elife-57358-supp-v1.zip]
